# Supplementary material for: Distinct miRNA Signatures and Networks Discern Fetal from Adult Erythroid Differentiation and Primary from Immortalized Erythroid Cells
Source: MDPI journal article supplement (doi:10.3390/ijms22073626), 2021-03-31
Supplement: s1 [file s1]

**Table S1. Summary of detected sncRNAs in samples.**

miRNA:microRNA, piRNA: piwi interacting RNA

| Sample name | Known miRNA count | Novel miRNA count | Known piRNA count | Novel piRNA count |
|-------------|-------------------|-------------------|-------------------|-------------------|
| CD34_E_A    | 1101              | 440               | 280               | 1202              |
| CD34_E_B    | 1167              | 459               | 228               | 1459              |
| CD34_E_C    | 1160              | 400               | 226               | 959               |
| CD34_L_A    | 939               | 211               | 336               | 1801              |
| CD34_L_B    | 993               | 373               | 145               | 1302              |
| CD34_L_C    | 1128              | 292               | 237               | 1047              |
| HUDEP1_E_A  | 1124              | 488               | 149               | 1057              |
| HUDEP1_E_B  | 1198              | 454               | 152               | 1711              |
| HUDEP1_E_C  | 1149              | 692               | 157               | 1816              |
| HUDEP1_L_A  | 1013              | 169               | 198               | 835               |
| HUDEP1_L_B  | 988               | 299               | 216               | 1653              |
| HUDEP1_L_C  | 947               | 447               | 164               | 1734              |
| HUDEP2_E_A  | 1097              | 551               | 279               | 947               |
| HUDEP2_E_B  | 1065              | 696               | 204               | 1375              |
| HUDEP2_E_C  | 1121              | 431               | 224               | 1335              |
| HUDEP2_L_A  | 625               | 177               | 214               | 829               |
| HUDEP2_L_B  | 967               | 315               | 182               | 976               |
| HUDEP2_L_C  | 943               | 260               | 199               | 1011              |
