# Supplementary material for: Distinct miRNA Signatures and Networks Discern Fetal from Adult Erythroid Differentiation and Primary from Immortalized Erythroid Cells
Source: MDPI journal article supplement (doi:10.3390/ijms22073626), 2021-03-31
Supplement: s1 [file s1]

**Table S4. Selection of exemplary miRNAs with relevant previous characterization.**

| miRNA ID     | Comment                                                                                                                                                                      | Panel*        | Reference  |
|--------------|------------------------------------------------------------------------------------------------------------------------------------------------------------------------------|---------------|------------|
| miR-451a     | The most abundant miRNA in erythrocytes, expression levels increase remarkably during erythroid differentiation, regulated by GATA 1                                         | a, b, c       | [17–19]    |
| miR-15b-5p   | Upregulated during erythroid differentiation                                                                                                                                 | a, c          | [18,41]    |
| miR-16-5p    | Upregulated during erythroid differentiation                                                                                                                                 | a, c          | [18,41,51] |
| miR-96-5p    | Upregulated during erythroid differentiation, upregulated in adult vs fetal erythroblasts, targets $\gamma$ -globin, knock-down increases $\gamma$ -globin expression by 20% | a, b, c, f    | [41,28]    |
| miR-22-3p    | Upregulated during erythroid differentiation                                                                                                                                 | a, c          | [18,41]    |
| miR-182-5p   | Abundant in erythroid cells, upregulated in adult vs fetal erythroblasts                                                                                                     | a, c, f       | [52,66]    |
| miR-4732-3p  | Abundant in erythroid cells, regulates the TGF- $\beta$ signaling cascade                                                                                                    | a, c          | [52]       |
| miR-223-5p   | Downregulated during erythroid differentiation, targets LMO2                                                                                                                 | a, c          | [20]       |
| miR-221-3p   | Downregulated during erythroid differentiation, targets c-KIT                                                                                                                | a, d, e       | [16]       |
| miR-222-3p   | Downregulated during erythroid differentiation, targets c-KIT                                                                                                                | a, d, e       | [16]       |
| miR181-3p    | Downregulated during late-stage erythropoiesis, targets Xpo7, regulates enucleation                                                                                          | a, b, c, d, e | [53]       |
| miR-106a     | OncomiR, dysregulated by HPV16-E6/E7                                                                                                                                         | d, e          | [58,59]    |
| miR-363      | OncomiR, dysregulated by HPV16-E6/E7                                                                                                                                         | d, e, f       | [58,59]    |
| miR-18b-5p   | OncomiR, dysregulated by HPV16-E6/E7                                                                                                                                         | d, e          | [58,59]    |
| miR-20b-5p   | OncomiR, dysregulated by HPV16-E6/E7                                                                                                                                         | d, e          | [58,59]    |
| miR-92a-2-5p | OncomiR, dysregulated by HPV16-E6/E7                                                                                                                                         | d, e          | [58,59]    |
| miR-125b-5p  | OncomiR                                                                                                                                                                      | d             | [62]       |
| miR-196a-5p  | OncomiR                                                                                                                                                                      | d             | [61]       |
| miR-4707-3p  | Dysregulated by HPV16-E6/E7                                                                                                                                                  | d, e          | [64]       |
| miR-143-3p   | Tumor suppressor                                                                                                                                                             | d, e          | [61]       |
| let-7 family | Upregulated in adult vs fetal erythroblasts, targets HMGA2                                                                                                                   | f             | [28,66,67] |
| miR-146a     | Upregulated in adult vs fetal erythroblasts, targets $\gamma$ -globin                                                                                                        | f             | [28]       |
| miR-150      | Upregulated in adult vs fetal erythroblasts                                                                                                                                  | f             | [28]       |
| miR-98-5p    | Upregulated in adult vs fetal erythroblasts                                                                                                                                  | f             | [66]       |
| miR-183-5p   | Upregulated in adult vs fetal erythroblasts                                                                                                                                  | f             | [66]       |
| miR-23a-5p   | Targets KLF3 and SP1, overexpression elevates expression of $\gamma$ -globin                                                                                                 | f             | [68]       |
| miR-27a-5p   | Targets KLF3 and SP1, overexpression elevates expression of $\gamma$ -globin                                                                                                 | f             | [68]       |
| miR-326      | Targets KLF1 expression, overexpression elevates expression of $\gamma$ -globin                                                                                              | f             | [69]       |
| miR-34a      | Targets STAT3 and c-KIT, overexpression elevates expression of $\gamma$ -globin                                                                                              | d, f          | [70]       |
| miR-32-5p    | Hydroxyurea-induced expression in sickle cell disease patients, targets BCL11A                                                                                               | f             | [71]       |
| miR-340-5p   | Hydroxyurea-induced expression in sickle cell disease patients, targets BCL11A                                                                                               | f             | [71]       |

\* Panel in Supplementary Figure 3 where the miRNA is plotted in the context of other differentially expressed miRNAs
